# Supplementary material for: Synthesis and Spectroscopic Studies of Novel Dichloro and Polymethoxy P-Nitrophenyl Hydrazones: A Comparative Study
Source: Preprints.org preprint supplement (doi:10.20944/preprints202203.0377.v1), 2022-03-29
Supplement: Supplementary file 1 [file supplementary]

Archive with 2 entries (2 files):
- Compounds 2D .mol
- SUPPLEMENTARY_INFORMATION.pdf
