# Supplementary material for: Synthesis and Spectroscopic Studies of Novel Dichloro and Polymethoxy P-Nitrophenyl Hydrazones: A Comparative Study
Source: Preprints.org preprint supplement (doi:10.20944/preprints202203.0377.v1), 2022-03-29
Supplement: Supplementary file 1 [file supplementary › Compounds 2D .mol]

Untitled Document-4
  Mrv1904 03222208562D          

 84 88  0  0  0  0            999 V2000
   -3.6173    7.7138    0.0000 C   0  0  0  0  0  0  0  0  0  0  0  0
   -3.6173    6.8887    0.0000 C   0  0  0  0  0  0  0  0  0  0  0  0
   -2.9028    6.4763    0.0000 C   0  0  0  0  0  0  0  0  0  0  0  0
   -2.1884    6.8887    0.0000 C   0  0  0  0  0  0  0  0  0  0  0  0
   -2.1884    7.7138    0.0000 C   0  0  0  0  0  0  0  0  0  0  0  0
   -2.9028    8.1263    0.0000 C   0  0  0  0  0  0  0  0  0  0  0  0
   -1.4739    8.1263    0.0000 C   0  0  0  0  0  0  0  0  0  0  0  0
   -0.7594    7.7138    0.0000 N   0  0  0  0  0  0  0  0  0  0  0  0
   -0.0450    8.1263    0.0000 N   0  0  0  0  0  0  0  0  0  0  0  0
    0.6695    7.7138    0.0000 C   0  0  0  0  0  0  0  0  0  0  0  0
    0.6695    6.8888    0.0000 C   0  0  0  0  0  0  0  0  0  0  0  0
    1.3840    6.4763    0.0000 C   0  0  0  0  0  0  0  0  0  0  0  0
    2.0985    6.8888    0.0000 C   0  0  0  0  0  0  0  0  0  0  0  0
    2.0985    7.7138    0.0000 C   0  0  0  0  0  0  0  0  0  0  0  0
    1.3840    8.1263    0.0000 C   0  0  0  0  0  0  0  0  0  0  0  0
   -4.3318    6.4763    0.0000 Cl  0  0  0  0  0  0  0  0  0  0  0  0
   -2.9028    8.9512    0.0000 Cl  0  0  0  0  0  0  0  0  0  0  0  0
    2.8129    6.4763    0.0000 N   0  3  0  0  0  0  0  0  0  0  0  0
    3.5274    6.8888    0.0000 O   0  0  0  0  0  0  0  0  0  0  0  0
    2.8129    5.6513    0.0000 O   0  5  0  0  0  0  0  0  0  0  0  0
   -3.8854    2.9288    0.0000 C   0  0  0  0  0  0  0  0  0  0  0  0
   -3.8854    2.1038    0.0000 C   0  0  0  0  0  0  0  0  0  0  0  0
   -3.1710    1.6912    0.0000 C   0  0  0  0  0  0  0  0  0  0  0  0
   -2.4565    2.1038    0.0000 C   0  0  0  0  0  0  0  0  0  0  0  0
   -2.4565    2.9288    0.0000 C   0  0  0  0  0  0  0  0  0  0  0  0
   -3.1710    3.3413    0.0000 C   0  0  0  0  0  0  0  0  0  0  0  0
   -1.7420    3.3413    0.0000 C   0  0  0  0  0  0  0  0  0  0  0  0
   -1.0275    2.9288    0.0000 N   0  0  0  0  0  0  0  0  0  0  0  0
   -0.3131    3.3413    0.0000 N   0  0  0  0  0  0  0  0  0  0  0  0
    0.4014    2.9288    0.0000 C   0  0  0  0  0  0  0  0  0  0  0  0
    0.4014    2.1038    0.0000 C   0  0  0  0  0  0  0  0  0  0  0  0
    1.1159    1.6912    0.0000 C   0  0  0  0  0  0  0  0  0  0  0  0
    1.8303    2.1038    0.0000 C   0  0  0  0  0  0  0  0  0  0  0  0
    1.8303    2.9288    0.0000 C   0  0  0  0  0  0  0  0  0  0  0  0
    1.1159    3.3413    0.0000 C   0  0  0  0  0  0  0  0  0  0  0  0
   -4.5999    3.3413    0.0000 Cl  0  0  0  0  0  0  0  0  0  0  0  0
   -3.1710    0.8662    0.0000 Cl  0  0  0  0  0  0  0  0  0  0  0  0
    2.5448    1.6912    0.0000 N   0  3  0  0  0  0  0  0  0  0  0  0
    3.2593    2.1038    0.0000 O   0  0  0  0  0  0  0  0  0  0  0  0
    2.5448    0.8662    0.0000 O   0  5  0  0  0  0  0  0  0  0  0  0
   -2.5448   -1.9800    0.0000 C   0  0  0  0  0  0  0  0  0  0  0  0
   -2.5448   -2.8050    0.0000 C   0  0  0  0  0  0  0  0  0  0  0  0
   -1.8303   -3.2175    0.0000 C   0  0  0  0  0  0  0  0  0  0  0  0
   -1.1159   -2.8050    0.0000 C   0  0  0  0  0  0  0  0  0  0  0  0
   -1.1159   -1.9800    0.0000 C   0  0  0  0  0  0  0  0  0  0  0  0
   -1.8303   -1.5675    0.0000 C   0  0  0  0  0  0  0  0  0  0  0  0
   -0.4014   -1.5675    0.0000 C   0  0  0  0  0  0  0  0  0  0  0  0
   -3.2593   -1.5675    0.0000 O   0  0  0  0  0  0  0  0  0  0  0  0
   -3.2593   -3.2175    0.0000 O   0  0  0  0  0  0  0  0  0  0  0  0
   -1.8303   -4.0425    0.0000 O   0  0  0  0  0  0  0  0  0  0  0  0
    0.3131   -1.9800    0.0000 N   0  0  0  0  0  0  0  0  0  0  0  0
    1.0275   -1.5675    0.0000 N   0  0  0  0  0  0  0  0  0  0  0  0
    1.7420   -1.9800    0.0000 C   0  0  0  0  0  0  0  0  0  0  0  0
    1.7420   -2.8050    0.0000 C   0  0  0  0  0  0  0  0  0  0  0  0
    2.4565   -3.2175    0.0000 C   0  0  0  0  0  0  0  0  0  0  0  0
    3.1710   -2.8050    0.0000 C   0  0  0  0  0  0  0  0  0  0  0  0
    3.1710   -1.9800    0.0000 C   0  0  0  0  0  0  0  0  0  0  0  0
    2.4565   -1.5675    0.0000 C   0  0  0  0  0  0  0  0  0  0  0  0
   -2.5448   -4.4550    0.0000 C   0  0  0  0  0  0  0  0  0  0  0  0
   -3.9737   -2.8050    0.0000 C   0  0  0  0  0  0  0  0  0  0  0  0
   -3.9737   -1.9800    0.0000 C   0  0  0  0  0  0  0  0  0  0  0  0
    3.8854   -3.2175    0.0000 N   0  3  0  0  0  0  0  0  0  0  0  0
    4.5999   -2.8050    0.0000 O   0  0  0  0  0  0  0  0  0  0  0  0
    3.8854   -4.0425    0.0000 O   0  5  0  0  0  0  0  0  0  0  0  0
   -2.7923   -6.8887    0.0000 C   0  0  0  0  0  0  0  0  0  0  0  0
   -2.7923   -7.7138    0.0000 C   0  0  0  0  0  0  0  0  0  0  0  0
   -2.0778   -8.1263    0.0000 C   0  0  0  0  0  0  0  0  0  0  0  0
   -1.3634   -7.7138    0.0000 C   0  0  0  0  0  0  0  0  0  0  0  0
   -1.3634   -6.8887    0.0000 C   0  0  0  0  0  0  0  0  0  0  0  0
   -2.0778   -6.4763    0.0000 C   0  0  0  0  0  0  0  0  0  0  0  0
   -3.5068   -8.1263    0.0000 O   0  0  0  0  0  0  0  0  0  0  0  0
   -4.2212   -7.7138    0.0000 C   0  0  0  0  0  0  0  0  0  0  0  0
   -0.6489   -6.4763    0.0000 C   0  0  0  0  0  0  0  0  0  0  0  0
    0.0656   -6.8887    0.0000 N   0  0  0  0  0  0  0  0  0  0  0  0
    0.7800   -6.4763    0.0000 N   0  0  0  0  0  0  0  0  0  0  0  0
    1.4945   -6.8887    0.0000 C   0  0  0  0  0  0  0  0  0  0  0  0
    1.4945   -7.7138    0.0000 C   0  0  0  0  0  0  0  0  0  0  0  0
    2.2090   -8.1263    0.0000 C   0  0  0  0  0  0  0  0  0  0  0  0
    2.9235   -7.7138    0.0000 C   0  0  0  0  0  0  0  0  0  0  0  0
    2.9235   -6.8887    0.0000 C   0  0  0  0  0  0  0  0  0  0  0  0
    2.2090   -6.4763    0.0000 C   0  0  0  0  0  0  0  0  0  0  0  0
    3.6379   -8.1263    0.0000 N   0  3  0  0  0  0  0  0  0  0  0  0
    4.3524   -7.7138    0.0000 O   0  0  0  0  0  0  0  0  0  0  0  0
    3.6379   -8.9512    0.0000 O   0  5  0  0  0  0  0  0  0  0  0  0
  1  2  2  0  0  0  0
  2  3  1  0  0  0  0
  3  4  2  0  0  0  0
  4  5  1  0  0  0  0
  5  6  2  0  0  0  0
  6  1  1  0  0  0  0
  5  7  1  0  0  0  0
  7  8  2  0  0  0  0
  8  9  1  0  0  0  0
  9 10  1  0  0  0  0
 10 11  2  0  0  0  0
 11 12  1  0  0  0  0
 12 13  2  0  0  0  0
 13 14  1  0  0  0  0
 14 15  2  0  0  0  0
 15 10  1  0  0  0  0
  2 16  1  0  0  0  0
  6 17  1  0  0  0  0
 13 18  1  0  0  0  0
 18 19  2  0  0  0  0
 18 20  1  0  0  0  0
 21 22  2  0  0  0  0
 22 23  1  0  0  0  0
 23 24  2  0  0  0  0
 24 25  1  0  0  0  0
 25 26  2  0  0  0  0
 26 21  1  0  0  0  0
 25 27  1  0  0  0  0
 27 28  2  0  0  0  0
 28 29  1  0  0  0  0
 29 30  1  0  0  0  0
 30 31  2  0  0  0  0
 31 32  1  0  0  0  0
 32 33  2  0  0  0  0
 33 34  1  0  0  0  0
 34 35  2  0  0  0  0
 35 30  1  0  0  0  0
 21 36  1  0  0  0  0
 23 37  1  0  0  0  0
 33 38  1  0  0  0  0
 38 39  2  0  0  0  0
 38 40  1  0  0  0  0
 41 42  2  0  0  0  0
 42 43  1  0  0  0  0
 43 44  2  0  0  0  0
 44 45  1  0  0  0  0
 45 46  2  0  0  0  0
 46 41  1  0  0  0  0
 45 47  1  0  0  0  0
 41 48  1  0  0  0  0
 42 49  1  0  0  0  0
 43 50  1  0  0  0  0
 47 51  2  0  0  0  0
 51 52  1  0  0  0  0
 52 53  1  0  0  0  0
 53 54  2  0  0  0  0
 54 55  1  0  0  0  0
 55 56  2  0  0  0  0
 56 57  1  0  0  0  0
 57 58  2  0  0  0  0
 58 53  1  0  0  0  0
 50 59  1  0  0  0  0
 49 60  1  0  0  0  0
 48 61  1  0  0  0  0
 56 62  1  0  0  0  0
 62 63  2  0  0  0  0
 62 64  1  0  0  0  0
 65 66  2  0  0  0  0
 66 67  1  0  0  0  0
 67 68  2  0  0  0  0
 68 69  1  0  0  0  0
 69 70  2  0  0  0  0
 70 65  1  0  0  0  0
 66 71  1  0  0  0  0
 71 72  1  0  0  0  0
 69 73  1  0  0  0  0
 73 74  2  0  0  0  0
 74 75  1  0  0  0  0
 75 76  1  0  0  0  0
 76 77  2  0  0  0  0
 77 78  1  0  0  0  0
 78 79  2  0  0  0  0
 79 80  1  0  0  0  0
 80 81  2  0  0  0  0
 81 76  1  0  0  0  0
 79 82  1  0  0  0  0
 82 83  2  0  0  0  0
 82 84  1  0  0  0  0
M  CHG  8  18   1  20  -1  38   1  40  -1  62   1  64  -1  82   1  84  -1
M  END
