# Supplementary material for: Synthesis and Spectroscopic Studies of Novel Dichloro and Polymethoxy P-Nitrophenyl Hydrazones: A Comparative Study
Source: Preprints.org preprint supplement (doi:10.20944/preprints202203.0377.v1), 2022-03-29
Supplement: Supplementary file 1 [file supplementary › SUPPLEMENTARY_INFORMATION.pdf]

# SUPPLEMENTARY INFORMATION

## (E)-1-(2,4-dichlorobenzylidene)-2-(4-nitrophenyl)hydrazine (3a)

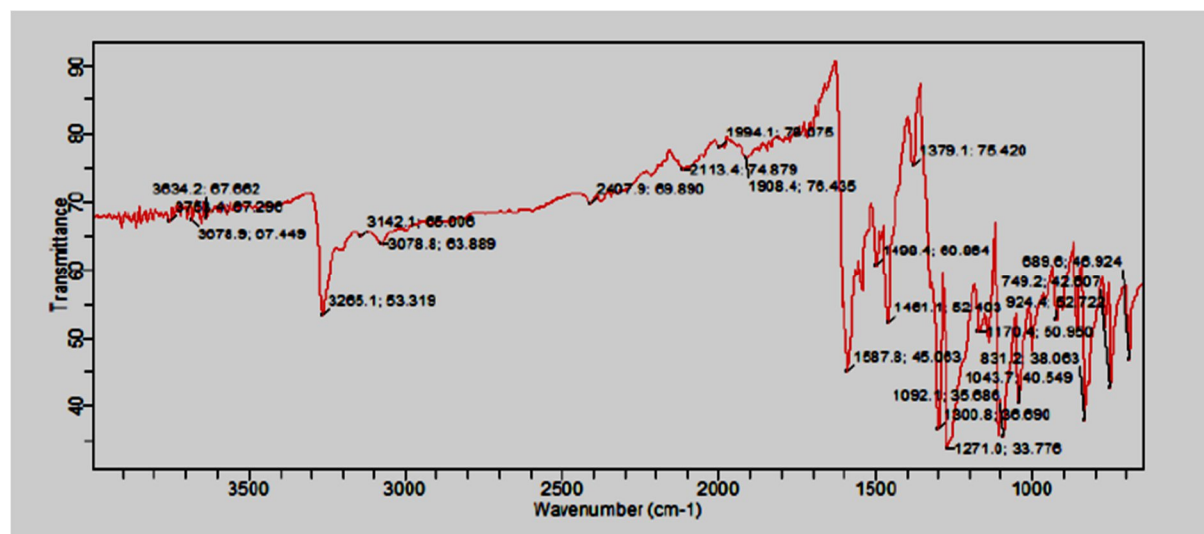

Figure S1: FTIR spectrum of compound 3a.

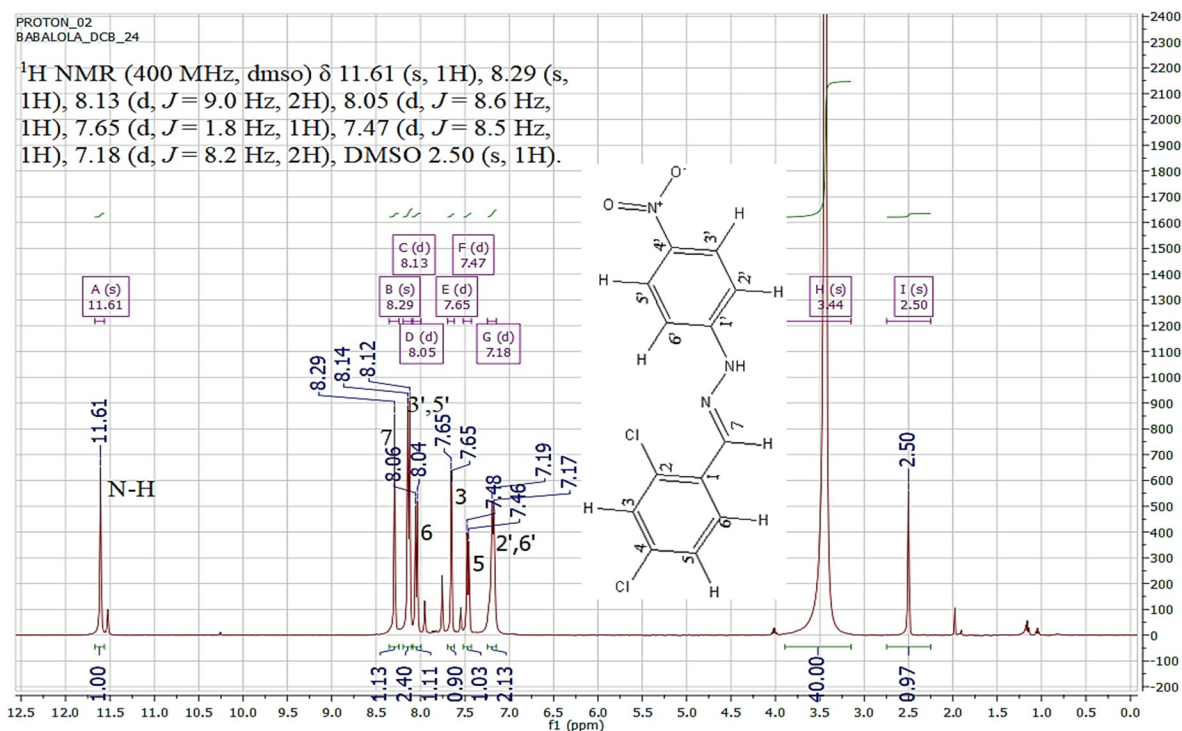

Figure S2: Elucidated <sup>1</sup>H-NMR spectrum of 3a

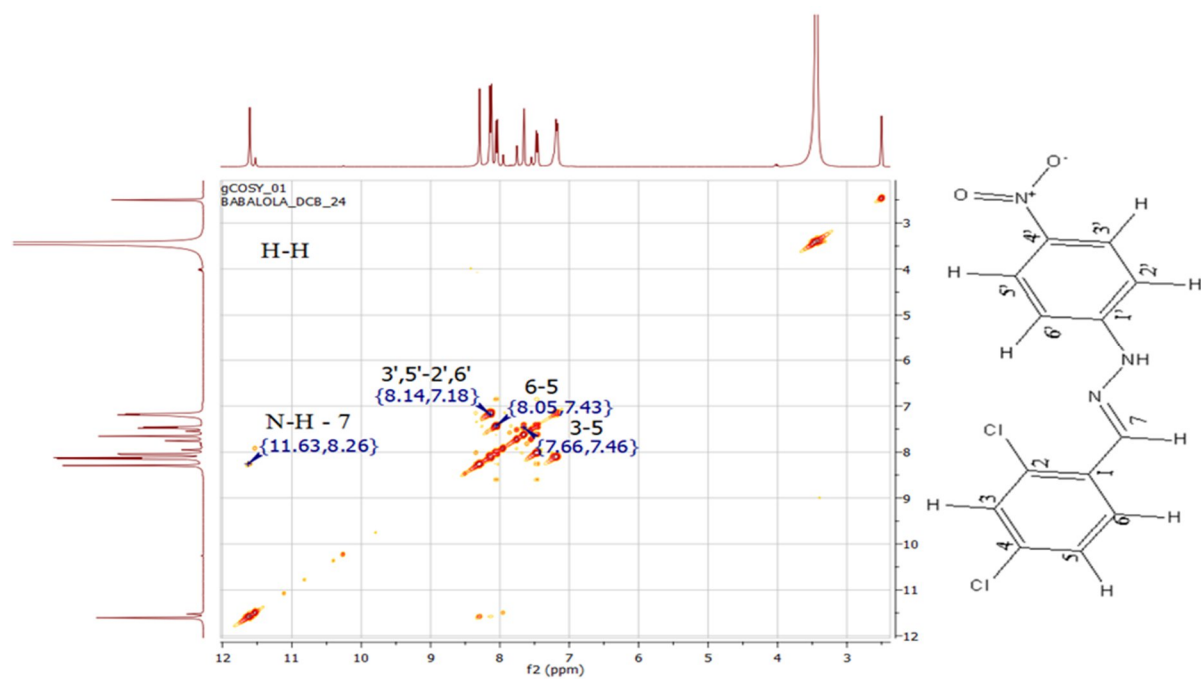

Figure S3: Elucidated COSY spectrum of 3a

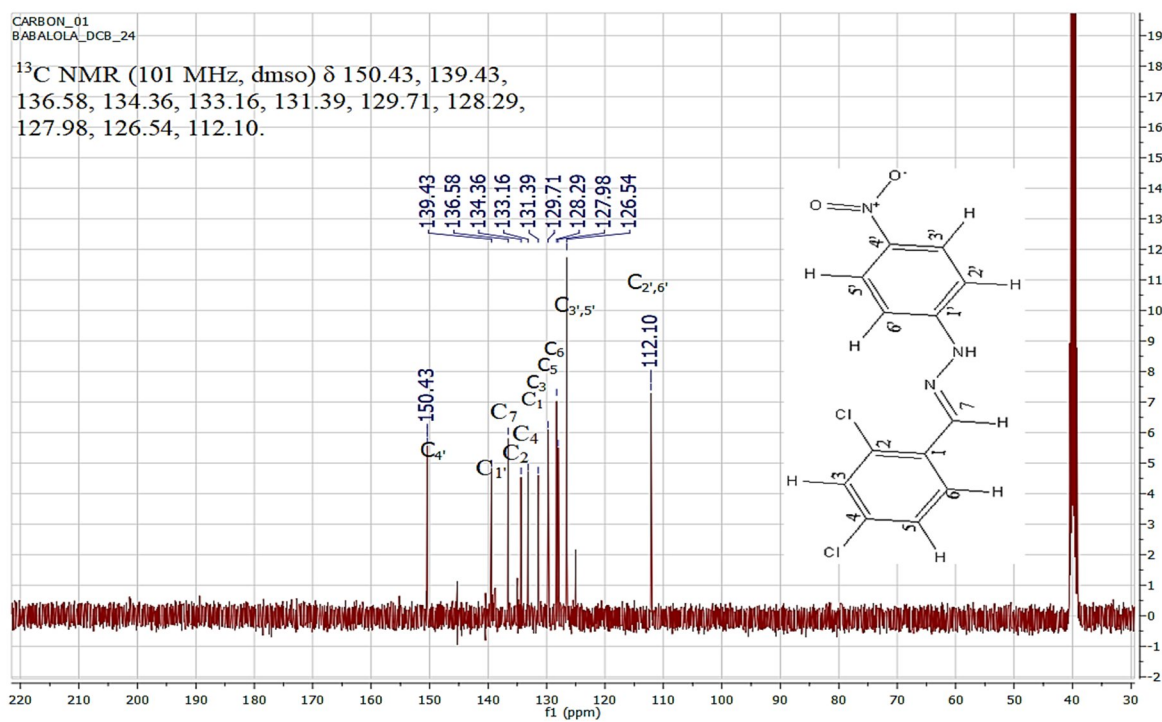

Figure S4: Elucidated C-13 spectrum of 3a

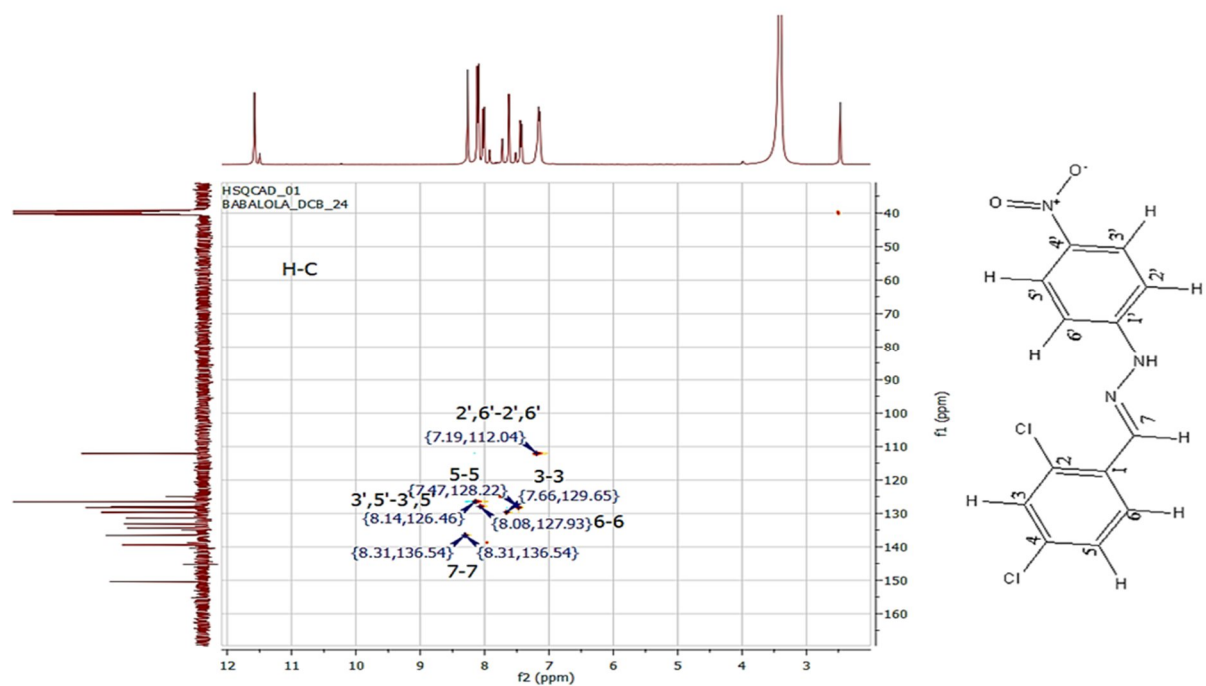

Figure S5: Elucidated HSQC spectrum of 3a

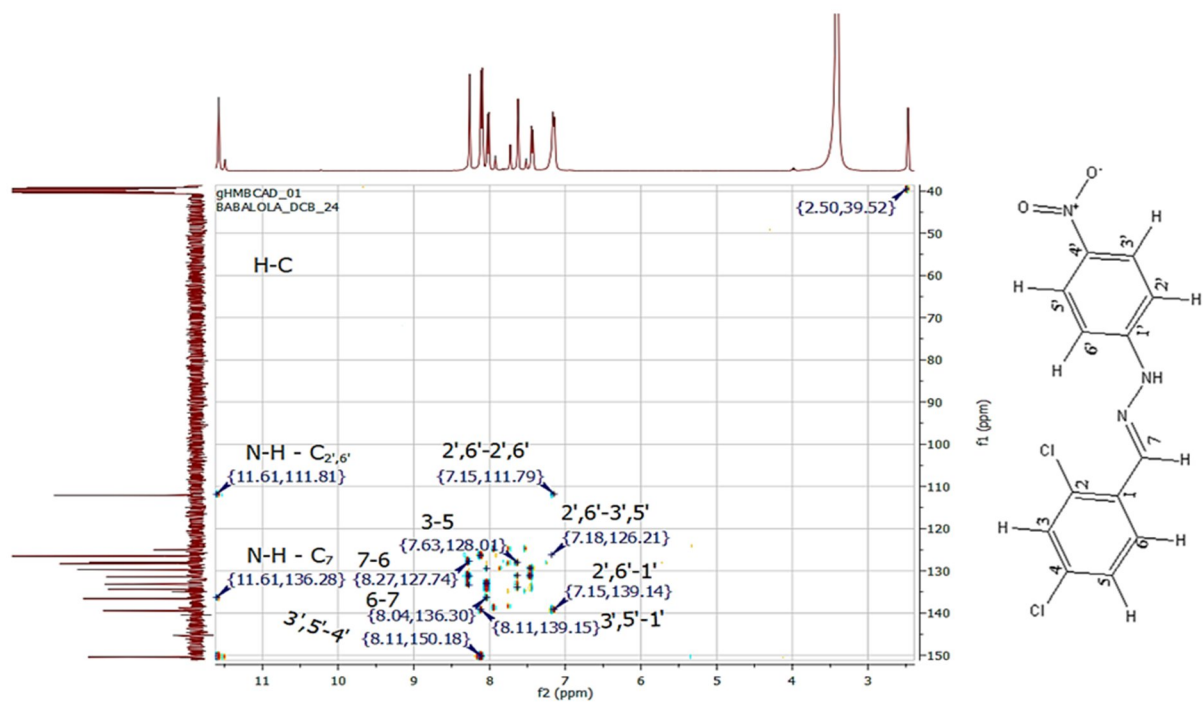

Figure S6: Elucidated HMBC (a) spectrum of 3a

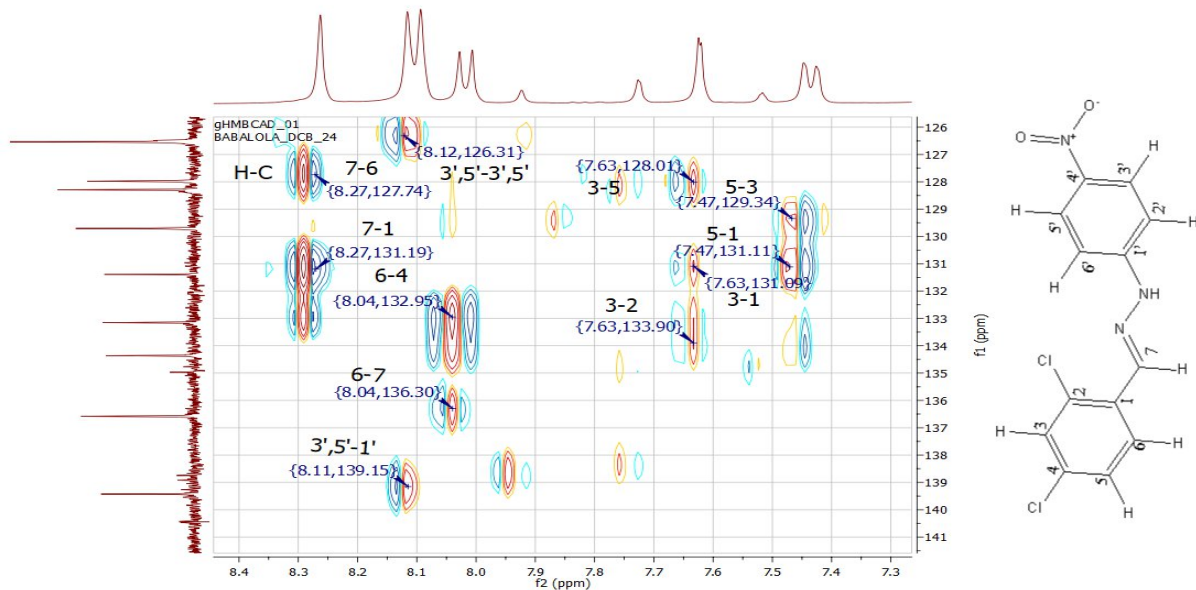

Figure S7: Elucidated HMBC (b) spectrum of 3a

**(E)-1-(3,5-dichlorobenzylidene)-2-(4-nitrophenyl)hydrazine (3b)**

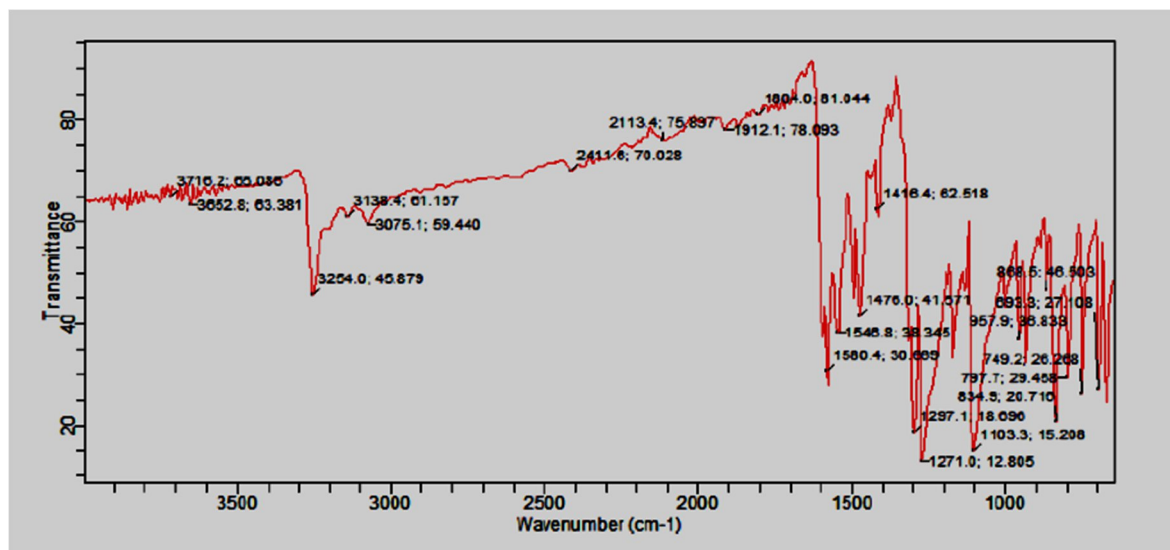

Figure S8: FTIR spectrum of 3b

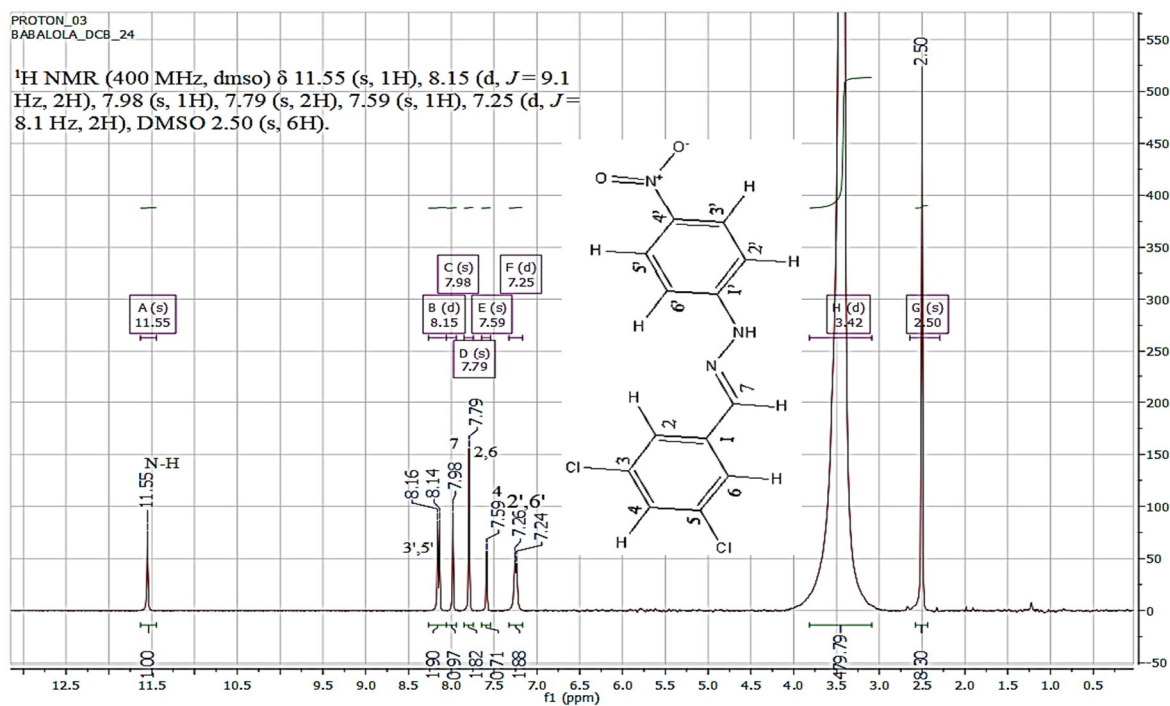

Figure S9: Elucidated  $^1\text{H}$ -NMR spectrum of 3b

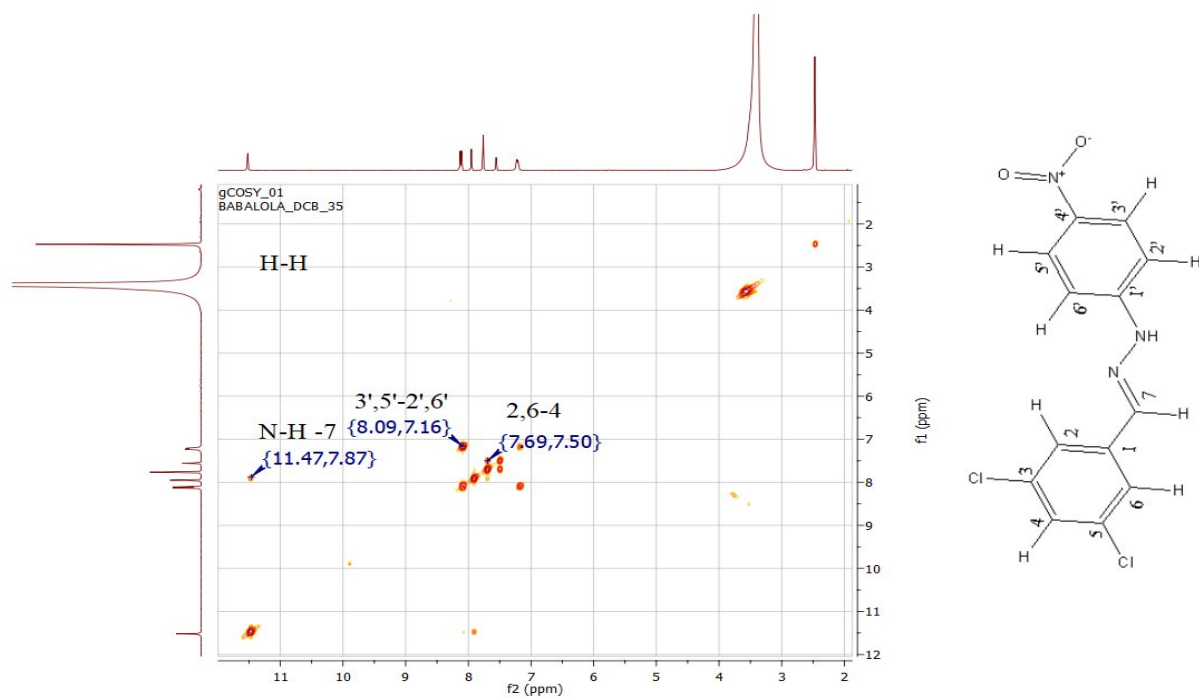

Figure S10: Elucidated COSY spectrum of 3b

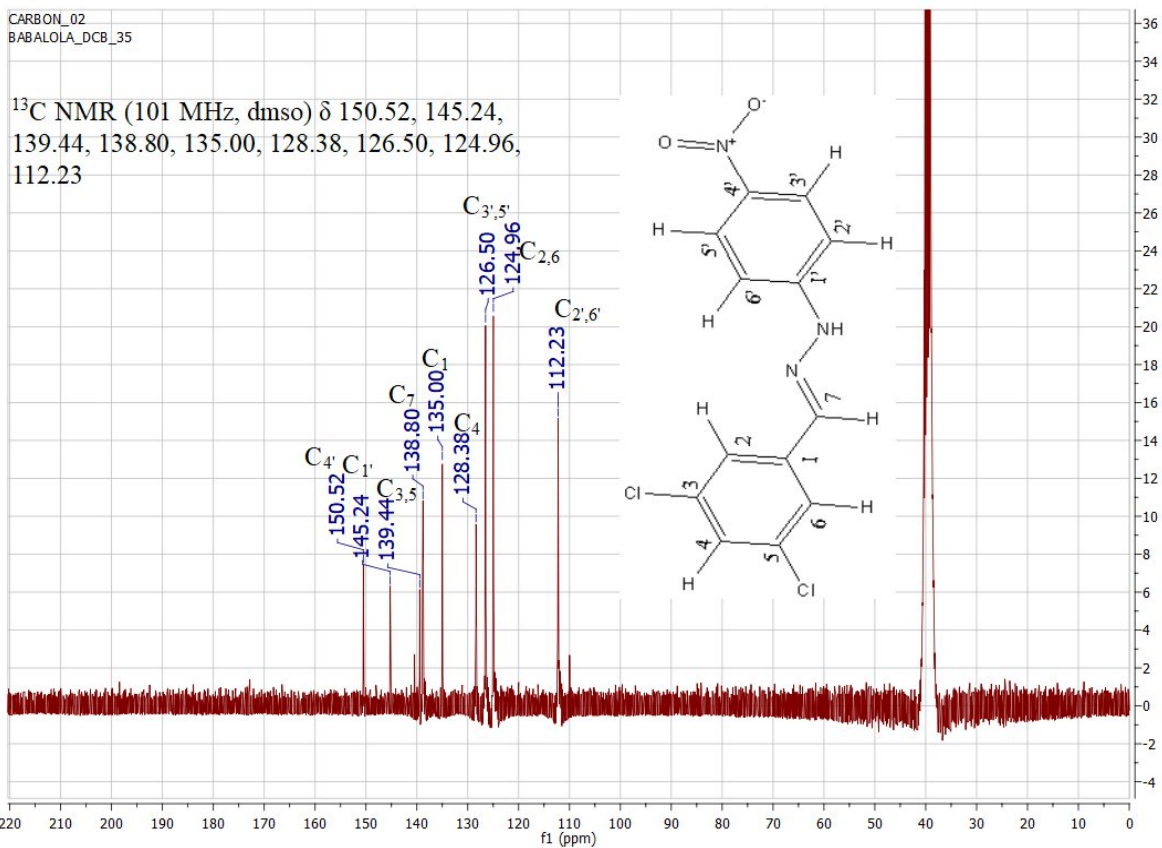

Figure S11: Elucidated C-13 spectrum of 3b

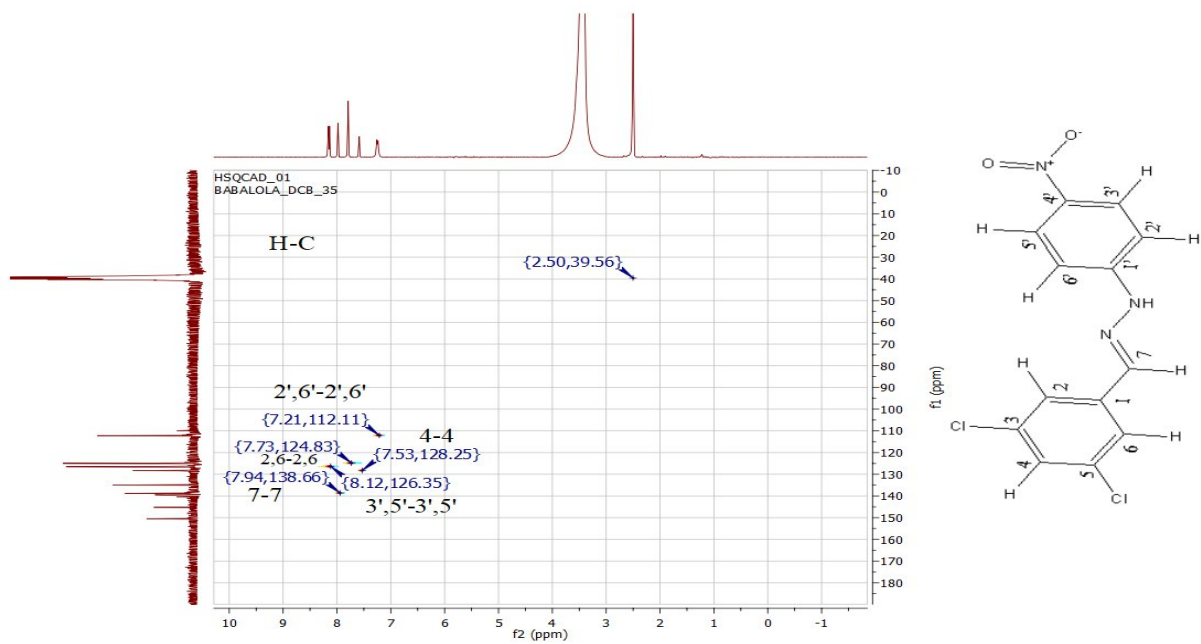

Figure S12: Elucidated HSQC spectrum of 3b

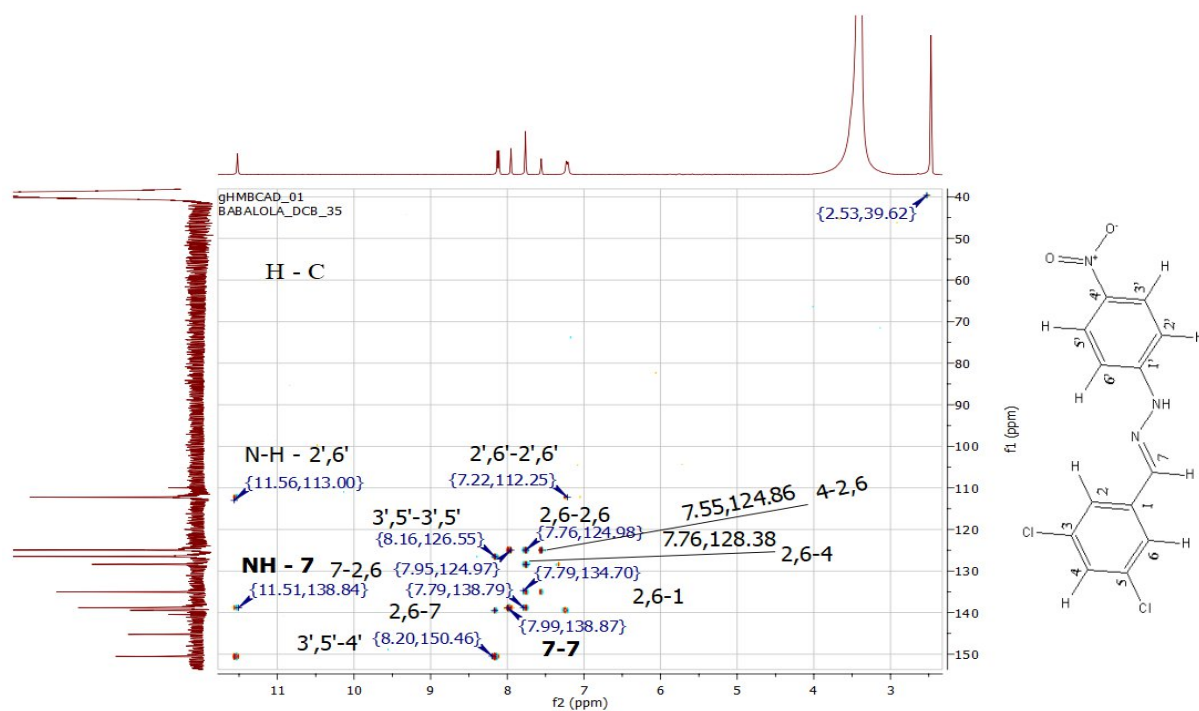

Figure S13: Elucidated HSQC spectrum of 3b

(E)-1-(4-nitrophenyl)-2-(3,4,5-trimethoxybenzylidene)hydrazine (3c)

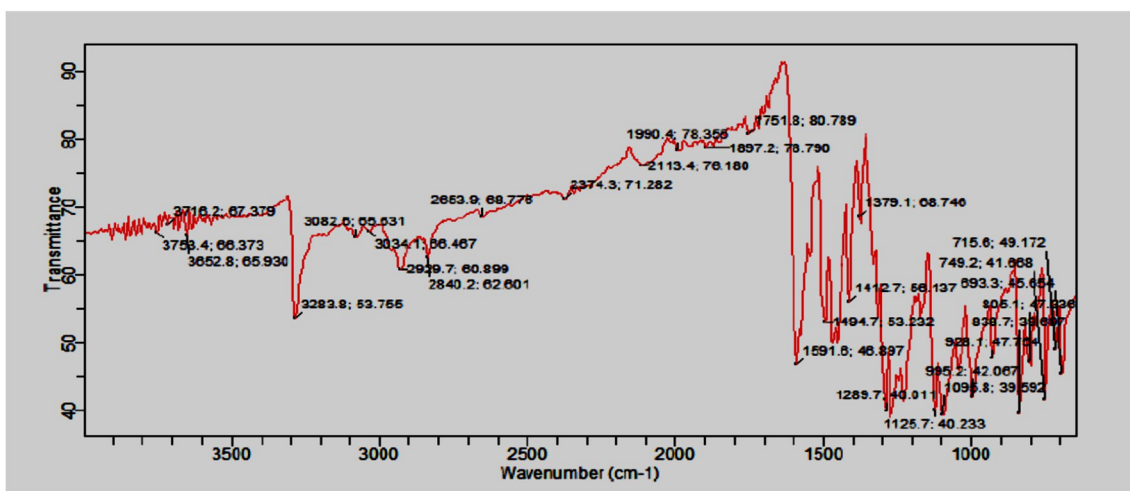

Figure S14: FTIR spectrum of compound 3c.

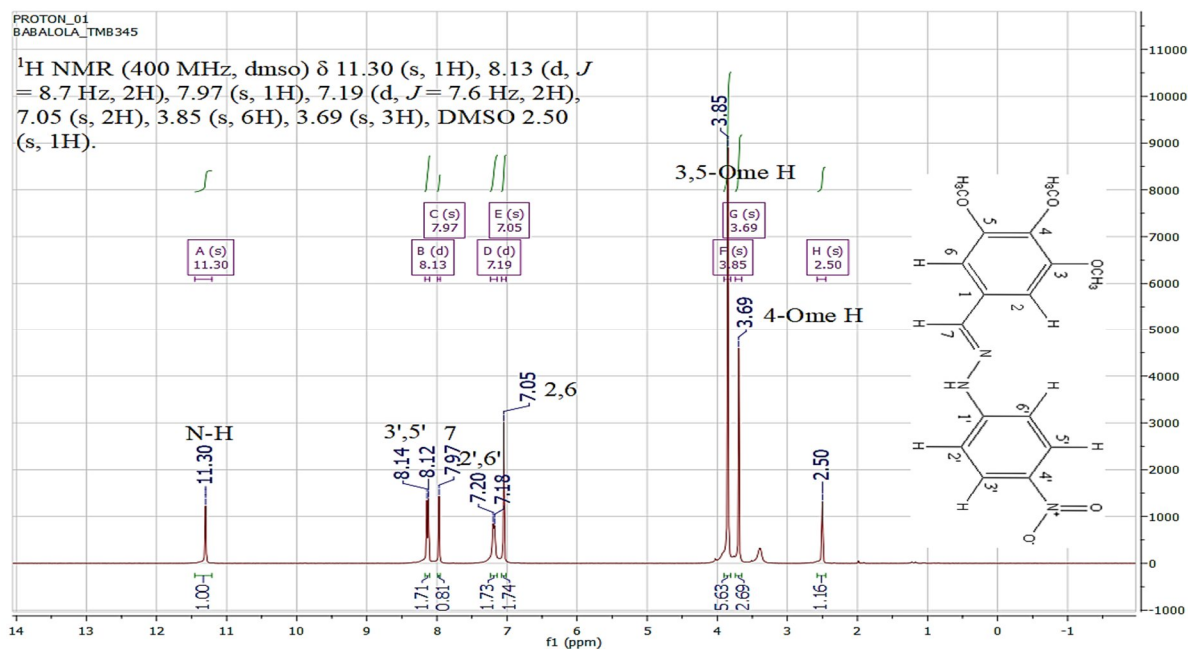

Figure S15: Elucidated  $^1\text{H}$ -NMR spectrum of compound 3c

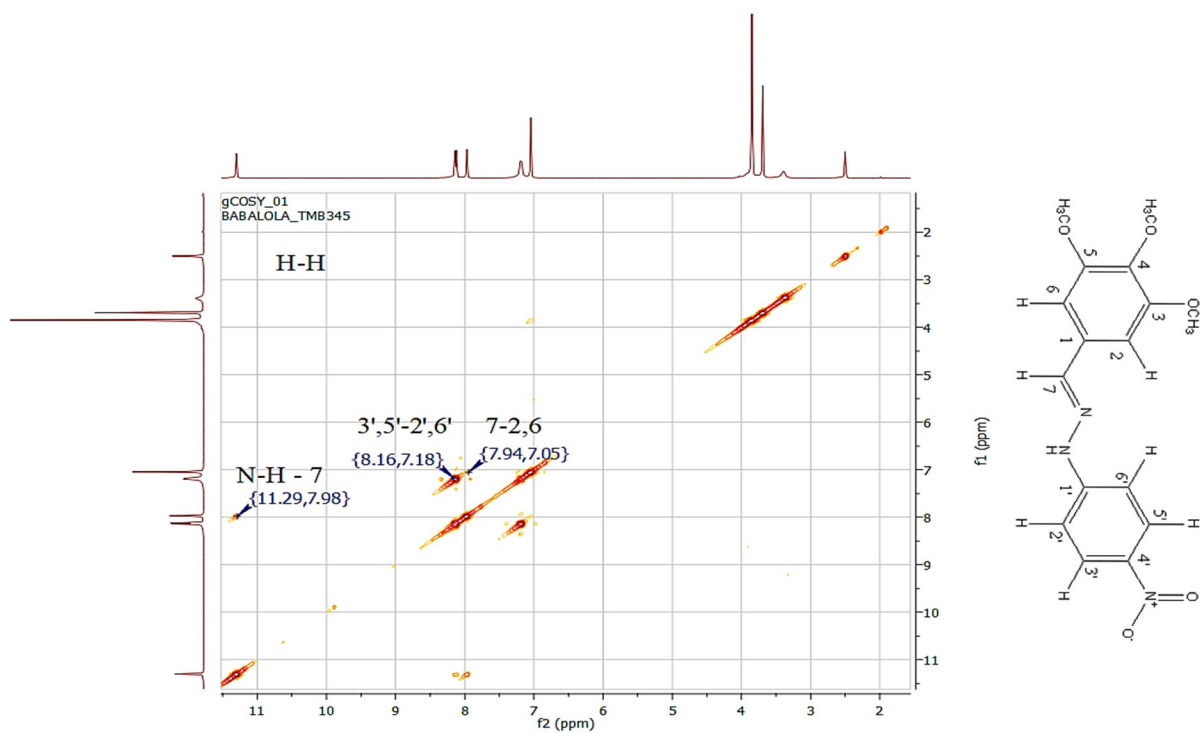

Figure S16: Elucidated COSY spectrum of compound 3c.

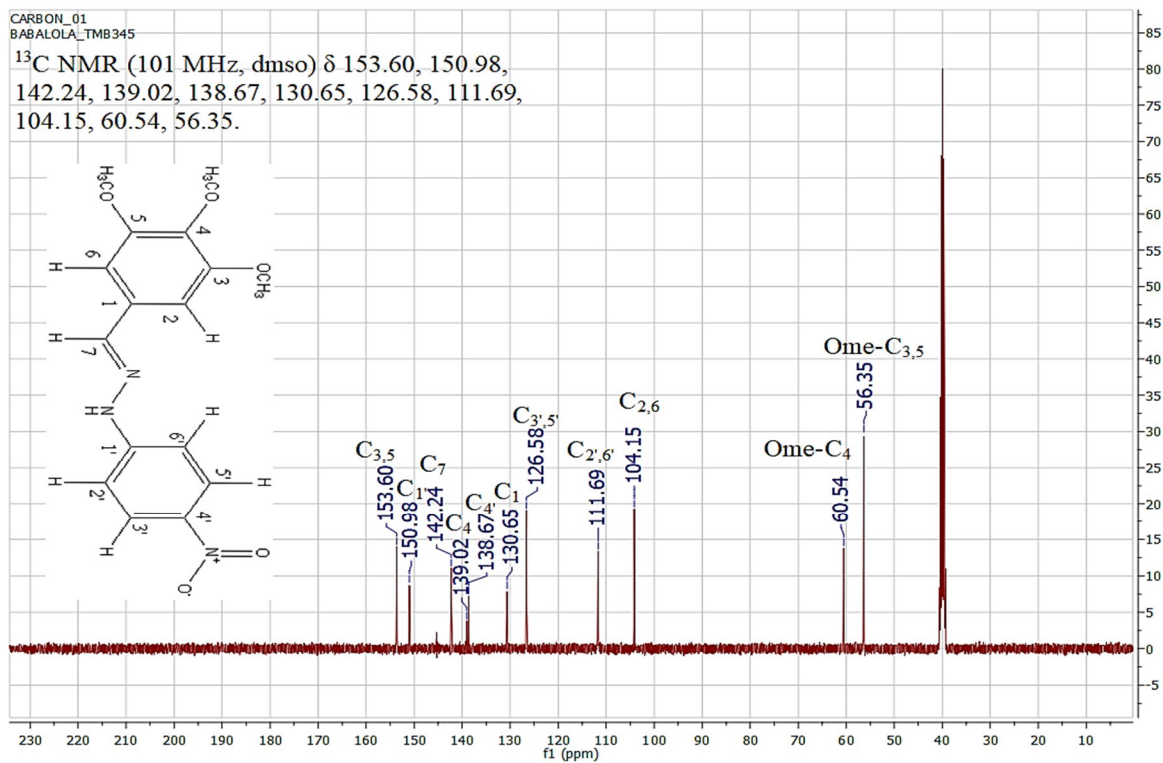

Figure S17: Elucidated C-13 spectrum of compound 3c

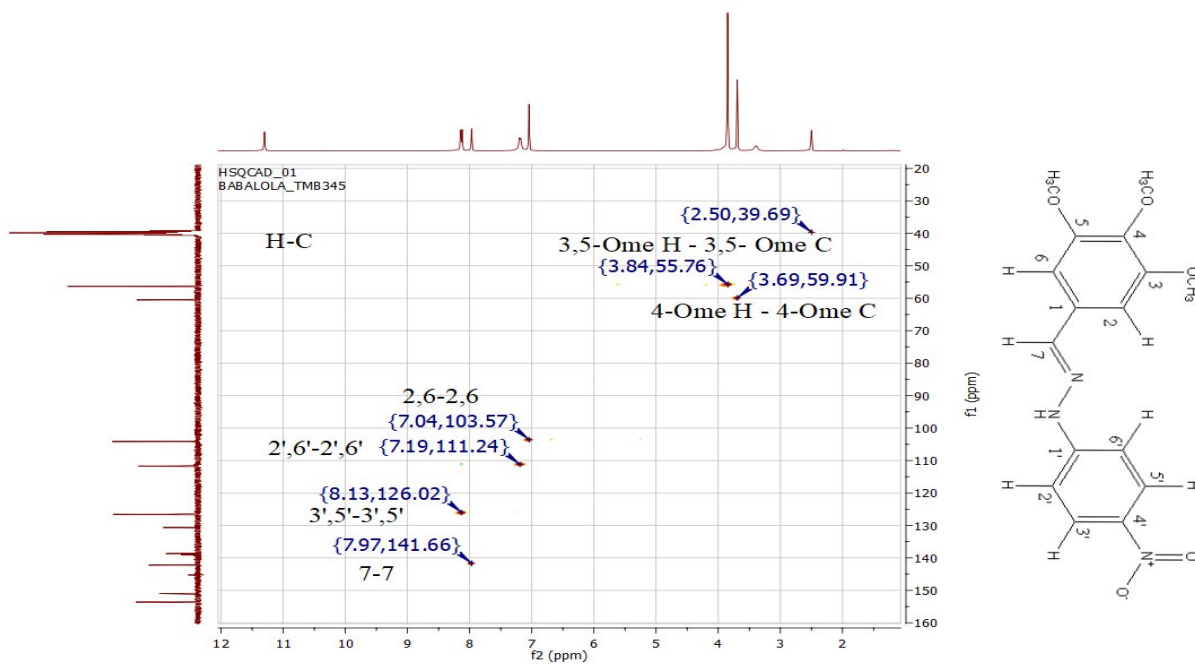

Figure S18: Elucidated HSQC spectrum of compound 3c

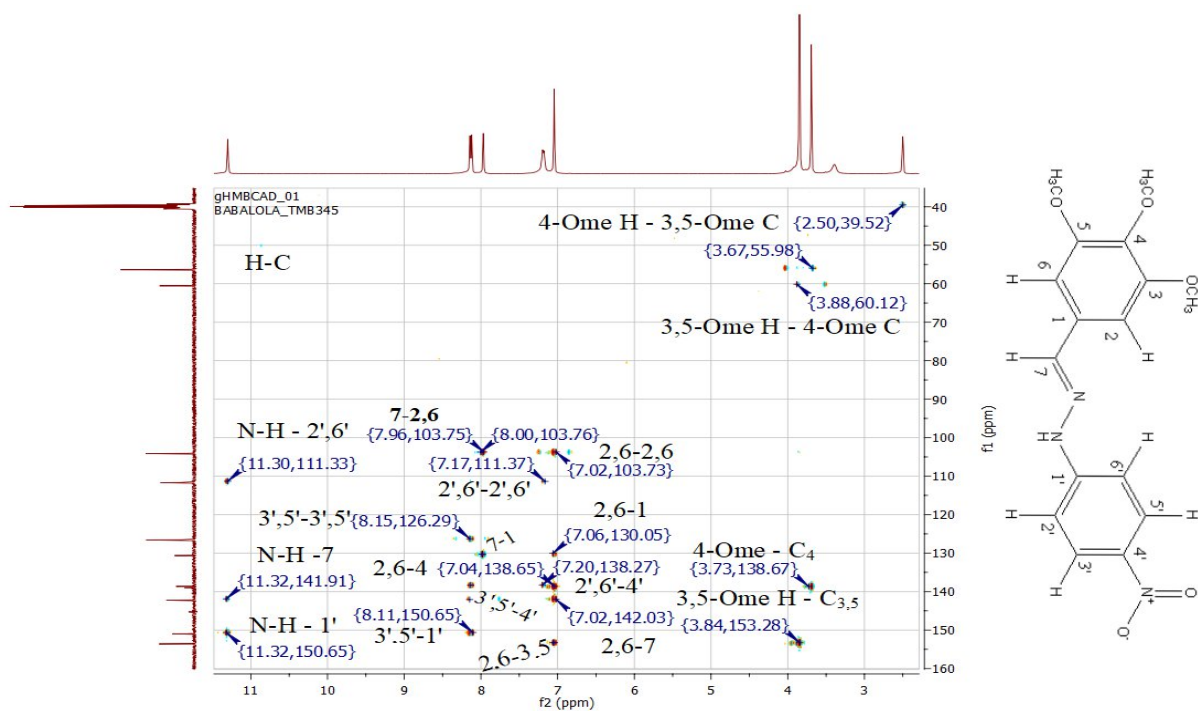

Figure S19: Elucidated HMBC spectrum of compound 3c

**(E)-1-(4-methoxybenzylidene)-2-(4-nitrophenyl)hydrazine (3d)**

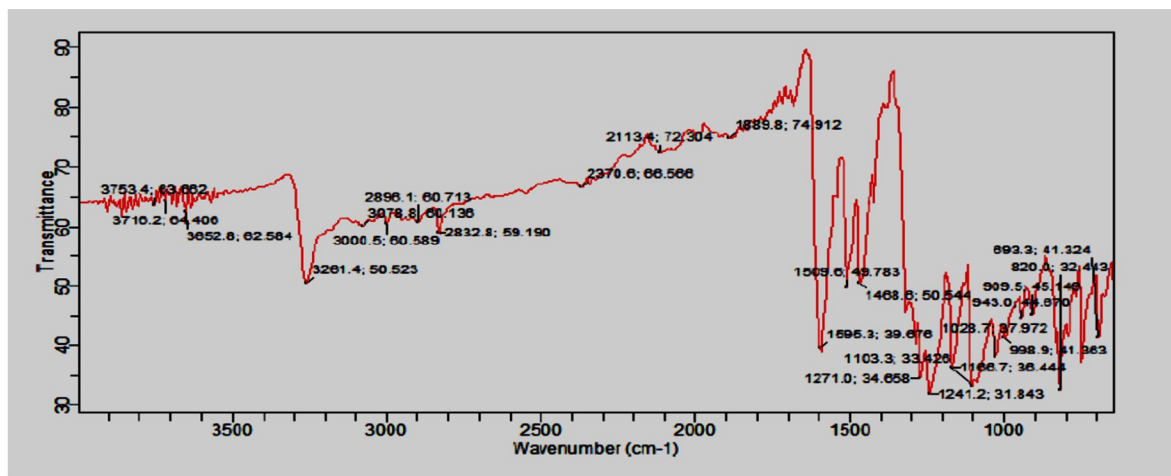

Figure S20: FTIR spectrum of compound 3d

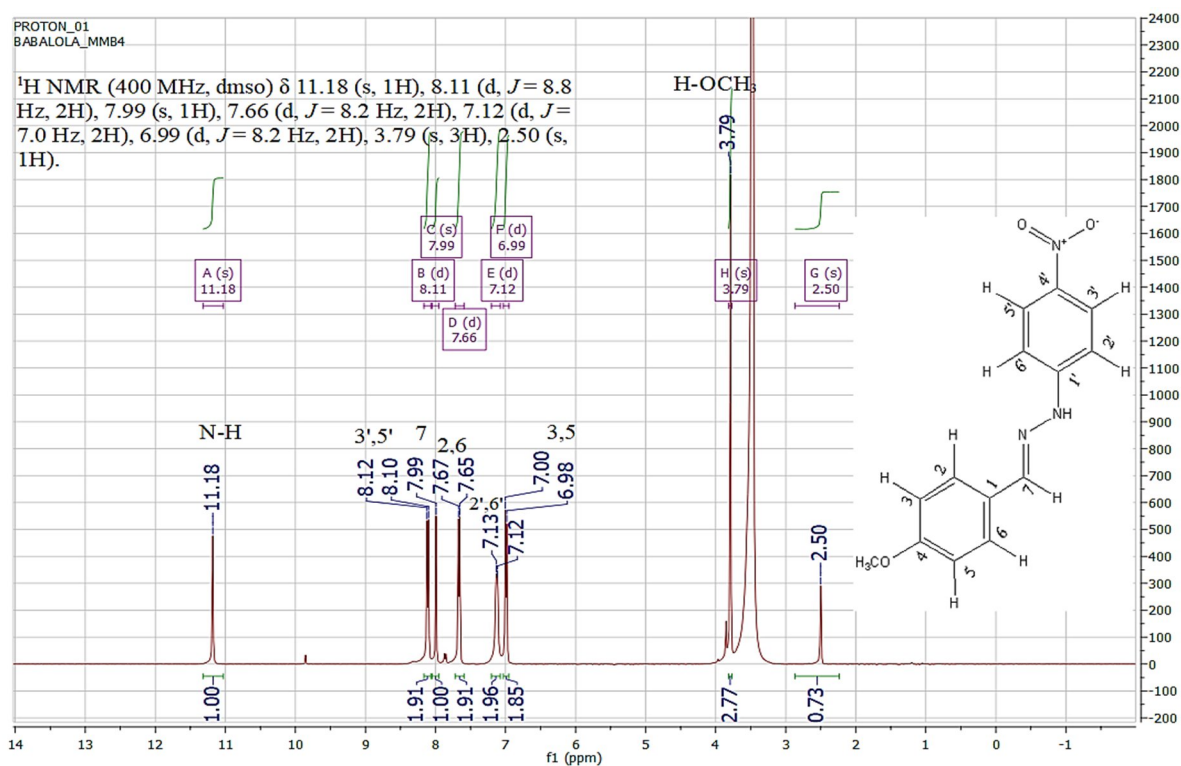

Figure S21: Elucidated  $^1\text{H}$ -NMR spectrum of compound 3d

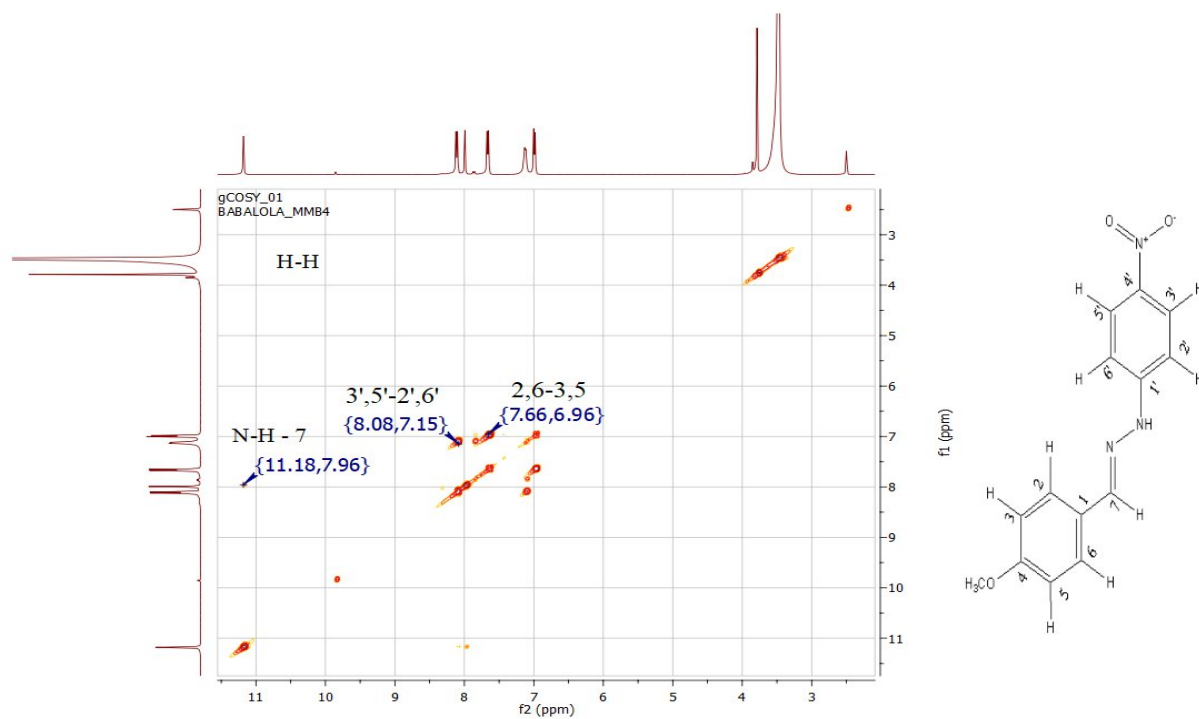

Figure S22: Elucidated COSY spectrum of compound 3d

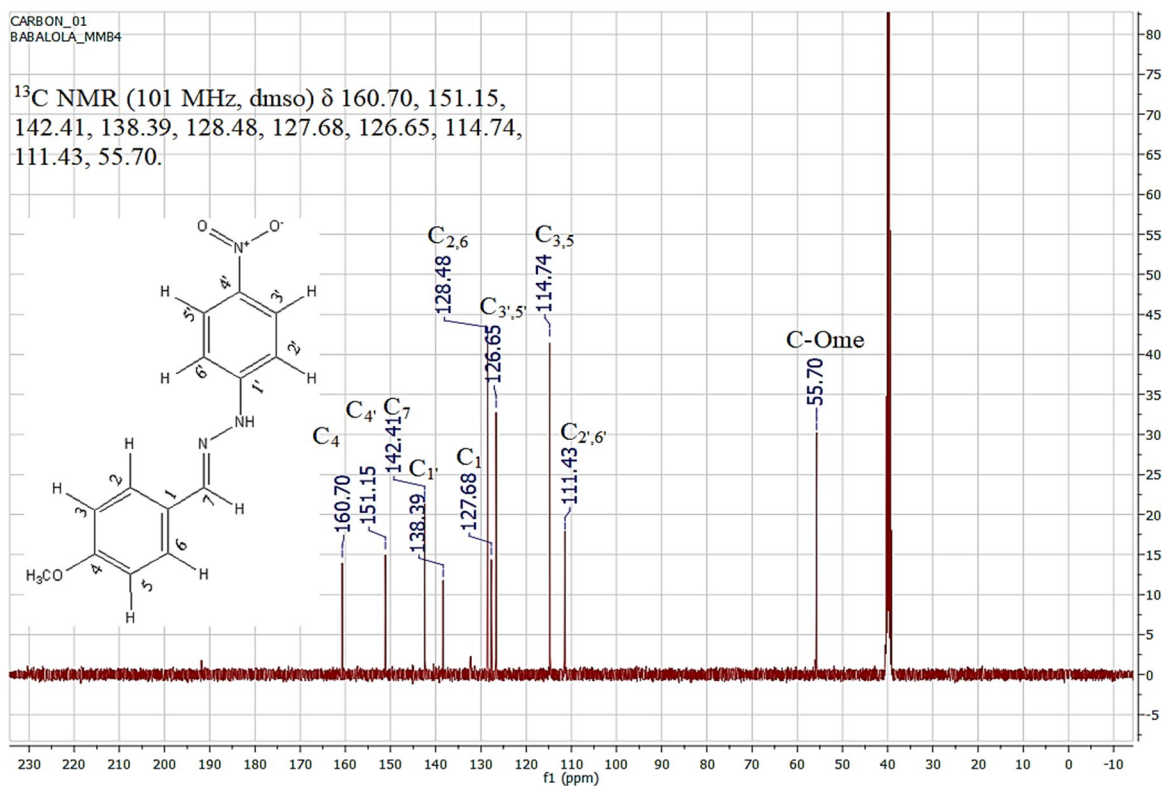

Figure S23: Elucidated C-13 spectrum of compound 3d

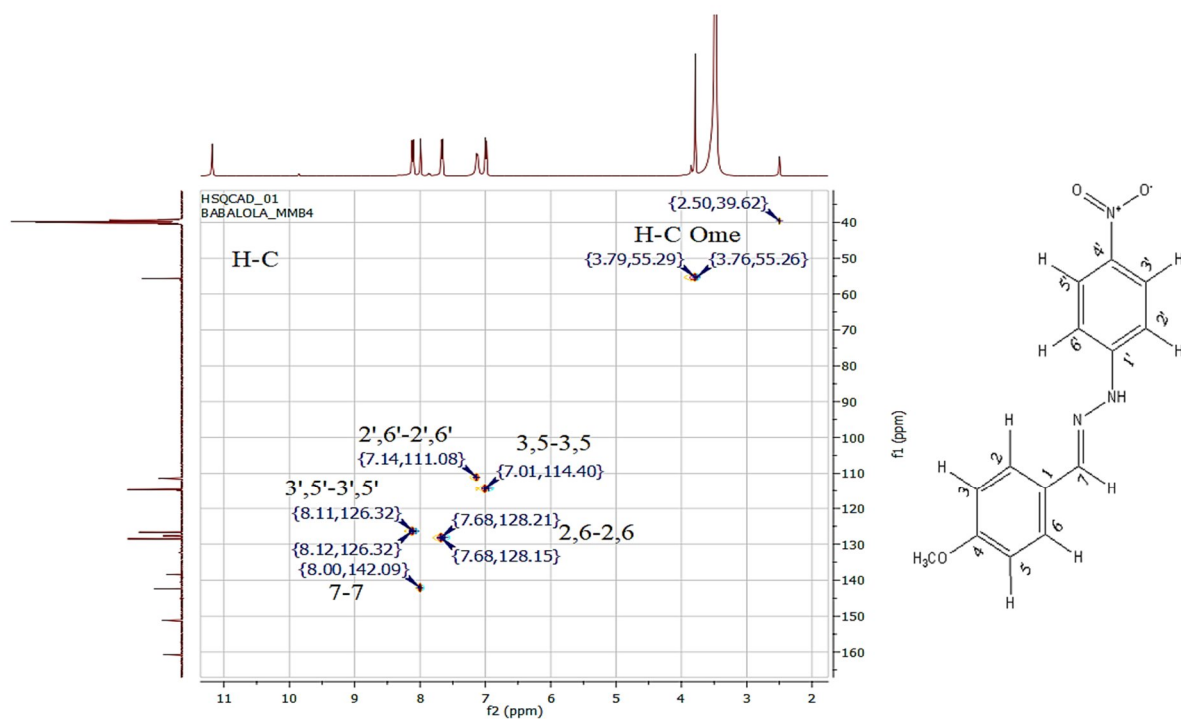

Figure S24: Elucidated HSQC spectrum of compound 3d

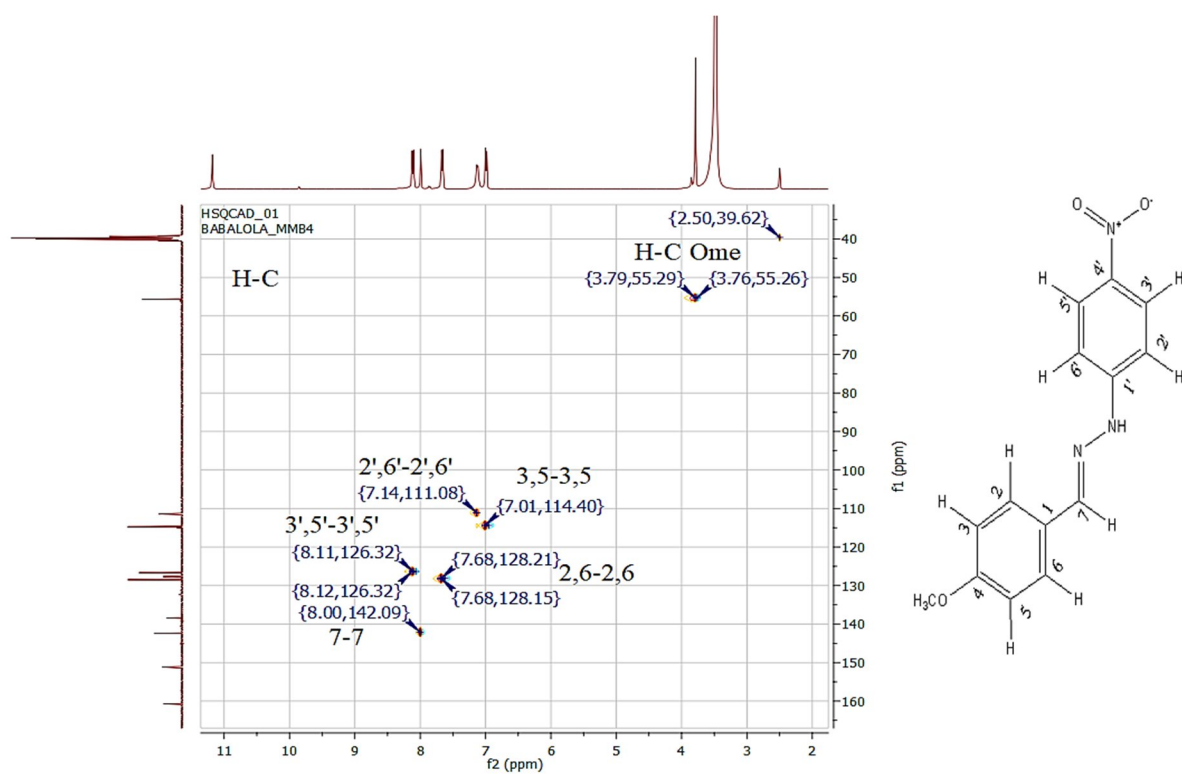

Figure S24: Elucidated HMBC spectrum of compound 3d
